# Supplementary material for: Testing the Impact of Robotic Lawn Mowers on European Hedgehogs (Erinaceus europaeus) and Designing a Safety Test
Source: MDPI journal article supplement (doi:10.3390/ani14010122), 2023-12-29
Supplement: s1 [file s1]

**Table S1.** The full dataset from the tests of collisions between hedgehog carcasses and robotic lawn mowers.

| Damage Category |   | Year | Hedgehog          | Hedgehog Weight (g) | Hedgehog Height (cm) | Hedgehog Circumference (cm) | Lawn Mower Model      | Cutting Height (mm) | Blades (Pivoting P and Fixed F) | Wheel Motor Current Collision Detection (Yes/No) | Collision Sensor (Yes/No) | Wheels (3 or 4) | Front (F)/Rear (R)-Wheel Drive | Skid Plate (Yes/No) | Headlights (Yes/No) | Ultrasonic Sensors (Yes/No) | Camera Vision (Yes/No) |
|-----------------|---|------|-------------------|---------------------|----------------------|-----------------------------|-----------------------|---------------------|---------------------------------|--------------------------------------------------|---------------------------|-----------------|--------------------------------|---------------------|---------------------|-----------------------------|------------------------|
| 1               | 2 | 2023 | real              | 480                 | 12                   | 50                          | STIHL iMOW 7 PRO      | 40                  | P                               | Yes                                              | No                        | 4               | R                              | No                  | Yes                 | Yes                         | No                     |
| 2               | 1 | 2023 | real              | 480                 | 12                   | 50                          | STIHL iMOW 7 PRO      | 40                  | P                               | Yes                                              | No                        | 4               | R                              | No                  | Yes                 | Yes                         | No                     |
| 3               | 2 | 2023 | real              | 480                 | 12                   | 50                          | STIHL iMOW 7 PRO      | 40                  | P                               | Yes                                              | No                        | 4               | R                              | No                  | Yes                 | Yes                         | No                     |
| 4               | 2 | 2023 | real              | 480                 | 12                   | 50                          | STIHL iMOW 7 PRO      | 40                  | P                               | Yes                                              | No                        | 4               | R                              | No                  | Yes                 | Yes                         | No                     |
| 5               | 2 | 2023 | real              | 480                 | 12                   | 50                          | STIHL iMOW 7 PRO      | 40                  | P                               | Yes                                              | No                        | 4               | R                              | No                  | Yes                 | Yes                         | No                     |
| 6               | 2 | 2023 | real              | 480                 | 12                   | 50                          | STIHL iMOW 7 PRO      | 40                  | P                               | Yes                                              | No                        | 4               | R                              | No                  | Yes                 | Yes                         | No                     |
| 1               | 2 | 2023 | real              | 403                 | 9                    | 48                          | STIHL iMOW 5          | 40                  | P                               | Yes                                              | No                        | 4               | R                              | No                  | Yes                 | Yes                         | No                     |
| 2               | 3 | 2023 | real              | 403                 | 9                    | 48                          | STIHL iMOW 5          | 40                  | P                               | Yes                                              | No                        | 4               | R                              | No                  | Yes                 | Yes                         | No                     |
| 3               | 3 | 2023 | real              | 403                 | 9                    | 48                          | STIHL iMOW 5          | 40                  | P                               | Yes                                              | No                        | 4               | R                              | No                  | Yes                 | Yes                         | No                     |
| 4               | 4 | 2023 | real              | 403                 | 9                    | 48                          | STIHL iMOW 5          | 40                  | P                               | Yes                                              | No                        | 4               | R                              | No                  | Yes                 | Yes                         | No                     |
| 5               | 4 | 2023 | real              | 403                 | 9                    | 48                          | STIHL iMOW 5          | 40                  | P                               | Yes                                              | No                        | 4               | R                              | No                  | Yes                 | Yes                         | No                     |
| 6               | 4 | 2023 | real              | 403                 | 9                    | 48                          | STIHL iMOW 5          | 40                  | P                               | Yes                                              | No                        | 4               | R                              | No                  | Yes                 | Yes                         | No                     |
| 1               | 2 | 2023 | real (comparison) | 480                 | 12                   | 50                          | STIHL iMOW 5          | 40                  | P                               | Yes                                              | No                        | 4               | R                              | No                  | Yes                 | Yes                         | No                     |
| 2               | 2 | 2023 | real (comparison) | 480                 | 12                   | 50                          | STIHL iMOW 5          | 40                  | P                               | Yes                                              | No                        | 4               | R                              | No                  | Yes                 | Yes                         | No                     |
| 3               | 2 | 2023 | real (comparison) | 480                 | 12                   | 50                          | STIHL iMOW 5          | 40                  | P                               | Yes                                              | No                        | 4               | R                              | No                  | Yes                 | Yes                         | No                     |
| 4               | 2 | 2023 | real (comparison) | 480                 | 12                   | 50                          | STIHL iMOW 5          | 40                  | P                               | Yes                                              | No                        | 4               | R                              | No                  | Yes                 | Yes                         | No                     |
| 5               | 2 | 2023 | real (comparison) | 480                 | 12                   | 50                          | STIHL iMOW 5          | 40                  | P                               | Yes                                              | No                        | 4               | R                              | No                  | Yes                 | Yes                         | No                     |
| 6               | 2 | 2023 | real (comparison) | 480                 | 12                   | 50                          | STIHL iMOW 5          | 40                  | P                               | Yes                                              | No                        | 4               | R                              | No                  | Yes                 | Yes                         | No                     |
| 1               | 4 | 2023 | real              | 511                 | 8                    | 47                          | STIHL iMOW 422 P      | 43                  | F                               | Yes                                              | No                        | 4               | R                              | No                  | No                  | No                          | No                     |
| 2               | 4 | 2023 | real              | 511                 | 8                    | 47                          | STIHL iMOW 422 P      | 43                  | F                               | Yes                                              | No                        | 4               | R                              | No                  | No                  | No                          | No                     |
| 3               | 3 | 2023 | real              | 490                 | 9                    | 51                          | STIHL iMOW 422 P      | 43                  | F                               | Yes                                              | No                        | 4               | R                              | No                  | No                  | No                          | No                     |
| 4               | 2 | 2023 | real              | 490                 | 9                    | 51                          | STIHL iMOW 422 P      | 43                  | F                               | Yes                                              | No                        | 4               | R                              | No                  | No                  | No                          | No                     |
| 5               | 3 | 2023 | real              | 490                 | 9                    | 51                          | STIHL iMOW 422 P      | 43                  | F                               | Yes                                              | No                        | 4               | R                              | No                  | No                  | No                          | No                     |
| 6               | 3 | 2023 | real              | 490                 | 9                    | 51                          | STIHL iMOW 422 P      | 43                  | F                               | Yes                                              | No                        | 4               | R                              | No                  | No                  | No                          | No                     |
| 1               | 4 | 2020 | real              | 417                 |                      |                             | STIHL iMOW 422 P      |                     | F                               | Yes                                              | No                        | 4               | R                              | No                  | No                  | No                          | No                     |
| 2               | 4 | 2020 | real              | 417                 |                      |                             | STIHL iMOW 422 P      |                     | F                               | Yes                                              | No                        | 4               | R                              | No                  | No                  | No                          | No                     |
| 3               | 4 | 2020 | real              | 417                 |                      |                             | STIHL iMOW 422 P      |                     | F                               | Yes                                              | No                        | 4               | R                              | No                  | No                  | No                          | No                     |
| 1               | 3 | 2023 | real              | 359                 | 9                    | 47                          | Stiga Stig-A 1500     | 35                  | P                               | Yes                                              | No                        | 4               | R                              | No                  | No                  | No                          | No                     |
| 2               | 3 | 2023 | real              | 359                 | 9                    | 47                          | Stiga Stig-A 1500     | 35                  | P                               | Yes                                              | No                        | 4               | R                              | No                  | No                  | No                          | No                     |
| 3               | 1 | 2023 | real              | 359                 | 9                    | 47                          | Stiga Stig-A 1500     | 35                  | P                               | Yes                                              | No                        | 4               | R                              | No                  | No                  | No                          | No                     |
| 4               | 3 | 2023 | real              | 359                 | 9                    | 47                          | Stiga Stig-A 1500     | 35                  | P                               | Yes                                              | No                        | 4               | R                              | No                  | No                  | No                          | No                     |
| 5               | 4 | 2023 | real              | 359                 | 9                    | 47                          | Stiga Stig-A 1500     | 35                  | P                               | Yes                                              | No                        | 4               | R                              | No                  | No                  | No                          | No                     |
| 6               | 4 | 2023 | real              | 359                 | 9                    | 47                          | Stiga Stig-A 1500     | 35                  | P                               | Yes                                              | No                        | 4               | R                              | No                  | No                  | No                          | No                     |
| 3               | 2 | 2023 | frozen            | 419                 | 10.5                 | 49                          | Stiga Stig-A 1500     | 35                  | P                               | Yes                                              | No                        | 4               | R                              | No                  | No                  | No                          | No                     |
| 1               | 3 | 2023 | real              | 545                 | 10                   | 52                          | Segway Navimow H3000E | 67                  | P                               | Yes                                              | No                        | 4               | R                              | No                  | No                  | No                          | No                     |
| 2               | 3 | 2023 | real              | 545                 | 10                   | 52                          | Segway Navimow H3000E | 67                  | P                               | Yes                                              | No                        | 4               | R                              | No                  | No                  | No                          | No                     |
| 3               | 3 | 2023 | real              | 545                 | 10                   | 52                          | Segway Navimow H3000E | 67                  | P                               | Yes                                              | No                        | 4               | R                              | No                  | No                  | No                          | No                     |
| 4               | 4 | 2023 | real              | 545                 | 10                   | 52                          | Segway Navimow H3000E | 67                  | P                               | Yes                                              | No                        | 4               | R                              | No                  | No                  | No                          | No                     |
| 5               | 4 | 2023 | real              | 545                 | 10                   | 52                          | Segway Navimow H3000E | 67                  | P                               | Yes                                              | No                        | 4               | R                              | No                  | No                  | No                          | No                     |
| 6               | 3 | 2023 | real              | 545                 | 10                   | 52                          | Segway Navimow H3000E | 67                  | P                               | Yes                                              | No                        | 4               | R                              | No                  | No                  | No                          | No                     |
| 3               | 2 | 2023 | frozen            | 419                 | 10.5                 | 49                          | Segway Navimow H3000E | 67                  | P                               | Yes                                              | No                        | 4               | R                              | No                  | No                  | No                          | No                     |
| 1               | 1 | 2023 | real              | 490                 | 9                    | 51                          | LandXscape LX812i     | 40                  | P                               | No                                               | Yes                       | 3               | R                              | No                  | No                  | Yes                         | No                     |
| 2               | 1 | 2023 | real              | 490                 | 9                    | 51                          | LandXscape LX812i     | 40                  | P                               | No                                               | Yes                       | 3               | R                              | No                  | No                  | Yes                         | No                     |

|   |   |      |                      |     |      |    |                     |    |   |     |     |   |   |     |     |     |    |
|---|---|------|----------------------|-----|------|----|---------------------|----|---|-----|-----|---|---|-----|-----|-----|----|
| 3 | 2 | 2023 | real                 | 490 | 9    | 51 | LandXScape LX812i   | 40 | P | No  | Yes | 3 | R | No  | No  | Yes | No |
| 4 | 2 | 2023 | real                 | 490 | 9    | 51 | LandXScape LX812i   | 40 | P | No  | Yes | 3 | R | No  | No  | Yes | No |
| 5 | 2 | 2023 | real                 | 490 | 9    | 51 | LandXScape LX812i   | 40 | P | No  | Yes | 3 | R | No  | No  | Yes | No |
| 6 | 2 | 2023 | real                 | 490 | 9    | 51 | LandXScape LX812i   | 40 | P | No  | Yes | 3 | R | No  | No  | Yes | No |
| 1 | 2 | 2020 | real                 | 347 |      |    | LandXScape LX812i   |    | P | No  | Yes | 3 | R | No  | No  | Yes | No |
| 2 | 3 | 2020 | real                 | 347 |      |    | LandXScape LX812i   |    | P | No  | Yes | 3 | R | No  | No  | Yes | No |
| 3 | 4 | 2020 | real                 | 347 |      |    | LandXScape LX812i   |    | P | No  | Yes | 3 | R | No  | No  | Yes | No |
| 1 | 4 | 2023 | real                 | 247 | 7.5  | 40 | Worx Landroid M     | 60 | P | No  | Yes | 4 | R | No  | No  | Yes | No |
| 2 | 4 | 2023 | real                 | 241 | 7    | 38 | Worx Landroid M     | 60 | P | No  | Yes | 4 | R | No  | No  | Yes | No |
| 3 | 4 | 2023 | real                 | 237 | 7    | 39 | Worx Landroid M     | 60 | P | No  | Yes | 4 | R | No  | No  | Yes | No |
| 4 | 4 | 2023 | real                 | 237 | 7    | 39 | Worx Landroid M     | 60 | P | No  | Yes | 4 | R | No  | No  | Yes | No |
| 5 | 4 | 2023 | real                 | 237 | 7    | 39 | Worx Landroid M     | 60 | P | No  | Yes | 4 | R | No  | No  | Yes | No |
| 6 | 4 | 2023 | real                 | 237 | 7    | 39 | Worx Landroid M     | 60 | P | No  | Yes | 4 | R | No  | No  | Yes | No |
| 3 | 2 | 2023 | real<br>(comparison) | 375 | 9    | 46 | Worx Landroid M     | 60 | P | No  | Yes | 4 | R | No  | No  | Yes | No |
| 4 | 3 | 2023 | real<br>(comparison) | 375 | 9    | 46 | Worx Landroid M     | 60 | P | No  | Yes | 4 | R | No  | No  | Yes | No |
| 5 | 3 | 2023 | real<br>(comparison) | 375 | 9    | 46 | Worx Landroid M     | 60 | P | No  | Yes | 4 | R | No  | No  | Yes | No |
| 6 | 4 | 2023 | real<br>(comparison) | 375 | 9    | 46 | Worx Landroid M     | 60 | P | No  | Yes | 4 | R | No  | No  | Yes | No |
| 1 | 4 | 2023 | real<br>(comparison) | 375 | 9    | 46 | Worx Landroid M     | 60 | P | No  | Yes | 4 | R | No  | No  | Yes | No |
| 2 | 4 | 2023 | real<br>(comparison) | 375 | 9    | 46 | Worx Landroid M     | 60 | P | No  | Yes | 4 | R | No  | No  | Yes | No |
| 3 | 2 | 2023 | frozen               | 419 | 10.5 | 49 | Worx Landroid M     | 60 | P | No  | Yes | 4 | R | No  | No  | Yes | No |
| 1 | 3 | 2020 | real                 | 422 |      |    | Worx Landroid M     |    | P | No  | Yes | 4 | R | No  | No  | Yes | No |
| 2 | 3 | 2020 | real                 | 422 |      |    | Worx Landroid M     |    | P | No  | Yes | 4 | R | No  | No  | Yes | No |
| 3 | 2 | 2020 | real                 | 422 |      |    | Worx Landroid M     |    | P | No  | Yes | 4 | R | No  | No  | Yes | No |
| 1 | 3 | 2023 | real                 | 482 | 9    | 47 | Worx Landroid L     | 60 | P | No  | Yes | 4 | R | No  | No  | No  | No |
| 2 | 4 | 2023 | real                 | 482 | 9    | 47 | Worx Landroid L     | 60 | P | No  | Yes | 4 | R | No  | No  | No  | No |
| 3 | 2 | 2023 | real                 | 482 | 9    | 47 | Worx Landroid L     | 60 | P | No  | Yes | 4 | R | No  | No  | No  | No |
| 4 | 2 | 2023 | real                 | 482 | 9    | 47 | Worx Landroid L     | 60 | P | No  | Yes | 4 | R | No  | No  | No  | No |
| 5 | 3 | 2023 | real                 | 482 | 9    | 47 | Worx Landroid L     | 60 | P | No  | Yes | 4 | R | No  | No  | No  | No |
| 6 | 4 | 2023 | real                 | 482 | 9    | 47 | Worx Landroid L     | 60 | P | No  | Yes | 4 | R | No  | No  | No  | No |
| 1 | 4 | 2020 | real                 | 422 |      |    | Worx Landroid L     |    | P | No  | Yes | 4 | R | No  | No  | No  | No |
| 2 | 3 | 2020 | real                 | 422 |      |    | Worx Landroid L     |    | P | No  | Yes | 4 | R | No  | No  | No  | No |
| 3 | 3 | 2020 | real                 | 422 |      |    | Worx Landroid L     |    | P | No  | Yes | 4 | R | No  | No  | No  | No |
| 1 | 2 | 2023 | real                 | 490 | 9    | 51 | Kress Mission KR111 | 45 | P | Yes | No  | 4 | R | No  | No  | Yes | No |
| 2 | 2 | 2023 | real                 | 490 | 9    | 51 | Kress Mission KR111 | 45 | P | Yes | No  | 4 | R | No  | No  | Yes | No |
| 3 | 4 | 2023 | real                 | 490 | 9    | 51 | Kress Mission KR111 | 45 | P | Yes | No  | 4 | R | No  | No  | Yes | No |
| 4 | 2 | 2023 | real                 | 490 | 9    | 51 | Kress Mission KR111 | 45 | P | Yes | No  | 4 | R | No  | No  | Yes | No |
| 5 | 4 | 2023 | real                 | 490 | 9    | 51 | Kress Mission KR111 | 45 | P | Yes | No  | 4 | R | No  | No  | Yes | No |
| 6 | 2 | 2023 | real                 | 490 | 9    | 51 | Kress Mission KR111 | 45 | P | Yes | No  | 4 | R | No  | No  | Yes | No |
| 1 | 4 | 2020 | real                 | 344 |      |    | Kress Mission KR111 |    | P | Yes | No  | 4 | R | No  | No  | Yes | No |
| 2 | 4 | 2020 | real                 | 344 |      |    | Kress Mission KR111 |    | P | Yes | No  | 4 | R | No  | No  | Yes | No |
| 3 | 4 | 2020 | real                 | 344 |      |    | Kress Mission KR111 |    | P | Yes | No  | 4 | R | No  | No  | Yes | No |
| 1 | 4 | 2023 | real                 | 290 | 7.5  | 40 | Husqvarna Nera      | 43 | P | Yes | No  | 4 | R | Yes | Yes | Yes | No |
| 2 | 4 | 2023 | real                 | 290 | 7.5  | 40 | Husqvarna Nera      | 43 | P | Yes | No  | 4 | R | Yes | Yes | Yes | No |
| 3 | 4 | 2023 | real                 | 318 | 9    | 40 | Husqvarna Nera      | 43 | P | Yes | No  | 4 | R | Yes | Yes | Yes | No |
| 4 | 2 | 2023 | real                 | 318 | 9    | 40 | Husqvarna Nera      | 43 | P | Yes | No  | 4 | R | Yes | Yes | Yes | No |
| 5 | 2 | 2023 | real                 | 318 | 9    | 40 | Husqvarna Nera      | 43 | P | Yes | No  | 4 | R | Yes | Yes | Yes | No |
| 6 | 2 | 2023 | real                 | 318 | 9    | 40 | Husqvarna Nera      | 43 | P | Yes | No  | 4 | R | Yes | Yes | Yes | No |
| 3 | 0 | 2023 | real<br>(comparison) | 419 | 9    | 57 | Husqvarna Nera      | 43 | P | Yes | No  | 4 | R | Yes | Yes | Yes | No |
| 3 | 3 | 2023 | real<br>(comparison) | 419 | 9    | 57 | Husqvarna Nera      | 43 | P | Yes | No  | 4 | R | Yes | Yes | Yes | No |
| 3 | 2 | 2023 | frozen               | 192 | 8    | 37 | Husqvarna Nera      | 43 | P | Yes | No  | 4 | R | Yes | Yes | Yes | No |
| 1 | 1 | 2023 | real<br>(comparison) | 419 | 9    | 57 | Husqvarna Aspire R4 | 50 | P | No  | Yes | 3 | F | No  | No  | No  | No |
| 2 | 1 | 2023 | real<br>(comparison) | 419 | 9    | 57 | Husqvarna Aspire R4 | 50 | P | No  | Yes | 3 | F | No  | No  | No  | No |

|   |   |      |                      |     |     |    |                          |    |   |     |     |   |   |     |     |     |    |
|---|---|------|----------------------|-----|-----|----|--------------------------|----|---|-----|-----|---|---|-----|-----|-----|----|
| 3 | 1 | 2023 | real<br>(comparison) | 419 | 9   | 57 | Husqvarna Aspire R4      | 50 | P | No  | Yes | 3 | F | No  | No  | No  | No |
| 4 | 2 | 2023 | real<br>(comparison) | 419 | 9   | 57 | Husqvarna Aspire R4      | 50 | P | No  | Yes | 3 | F | No  | No  | No  | No |
| 5 | 1 | 2023 | real<br>(comparison) | 419 | 9   | 57 | Husqvarna Aspire R4      | 50 | P | No  | Yes | 3 | F | No  | No  | No  | No |
| 6 | 1 | 2023 | real<br>(comparison) | 419 | 9   | 57 | Husqvarna Aspire R4      | 50 | P | No  | Yes | 3 | F | No  | No  | No  | No |
| 3 | 2 | 2023 | frozen               | 192 | 8   | 37 | Husqvarna Aspire R4      | 50 | P | No  | Yes | 3 | F | No  | No  | No  | No |
| 1 | 1 | 2023 | real                 | 246 | 6.5 | 38 | Husqvarna Aspire R4      | 50 | P | No  | Yes | 3 | F | No  | No  | No  | No |
| 2 | 1 | 2023 | real                 | 246 | 6.5 | 38 | Husqvarna Aspire R4      | 50 | P | No  | Yes | 3 | F | No  | No  | No  | No |
| 3 | 1 | 2023 | real                 | 246 | 6.5 | 38 | Husqvarna Aspire R4      | 50 | P | No  | Yes | 3 | F | No  | No  | No  | No |
| 4 | 2 | 2023 | real                 | 246 | 6.5 | 38 | Husqvarna Aspire R4      | 50 | P | No  | Yes | 3 | F | No  | No  | No  | No |
| 5 | 1 | 2023 | real                 | 246 | 6.5 | 38 | Husqvarna Aspire R4      | 50 | P | No  | Yes | 3 | F | No  | No  | No  | No |
| 6 | 4 | 2023 | real                 | 246 | 6.5 | 38 | Husqvarna Aspire R4      | 50 | P | No  | Yes | 3 | F | No  | No  | No  | No |
| 1 | 1 | 2023 | real                 | 318 | 9   | 40 | Husqvarna Automower 450X | 60 | P | Yes | No  | 4 | R | Yes | Yes | Yes | No |
| 2 | 2 | 2023 | real                 | 318 | 9   | 40 | Husqvarna Automower 450X | 60 | P | Yes | No  | 4 | R | Yes | Yes | Yes | No |
| 3 | 1 | 2023 | real                 | 318 | 9   | 40 | Husqvarna Automower 450X | 60 | P | Yes | No  | 4 | R | Yes | Yes | Yes | No |
| 4 | 2 | 2023 | real                 | 318 | 9   | 40 | Husqvarna Automower 450X | 60 | P | Yes | No  | 4 | R | Yes | Yes | Yes | No |
| 5 | 1 | 2023 | real                 | 318 | 9   | 40 | Husqvarna Automower 450X | 60 | P | Yes | No  | 4 | R | Yes | Yes | Yes | No |
| 6 | 1 | 2023 | real                 | 318 | 9   | 40 | Husqvarna Automower 450X | 60 | P | Yes | No  | 4 | R | Yes | Yes | Yes | No |
| 1 | 1 | 2020 | real                 | 422 |     |    | Husqvarna Automower 450X |    | P | Yes | No  | 4 | R | Yes | Yes | Yes | No |
| 2 | 2 | 2020 | real                 | 422 |     |    | Husqvarna Automower 450X |    | P | Yes | No  | 4 | R | Yes | Yes | Yes | No |
| 3 | 2 | 2020 | real                 | 422 |     |    | Husqvarna Automower 450X |    | P | Yes | No  | 4 | R | Yes | Yes | Yes | No |
| 3 | 1 | 2023 | real<br>(comparison) | 419 | 9   | 57 | Husqvarna Automower 450X | 60 | P | Yes | No  | 4 | R | Yes | Yes | Yes | No |
| 3 | 2 | 2023 | frozen               | 192 | 8   | 37 | Husqvarna Automower 450X | 60 | P | Yes | No  | 4 | R | Yes | Yes | Yes | No |
| 1 | 4 | 2023 | real                 | 237 | 7   | 39 | Husqvarna Automower 310  | 65 | P | Yes | No  | 4 | R | Yes | No  | No  | No |
| 2 | 3 | 2023 | real                 | 237 | 7   | 39 | Husqvarna Automower 310  | 65 | P | Yes | No  | 4 | R | Yes | No  | No  | No |
| 3 | 3 | 2023 | real                 | 237 | 7   | 39 | Husqvarna Automower 310  | 65 | P | Yes | No  | 4 | R | Yes | No  | No  | No |
| 4 | 3 | 2023 | real                 | 237 | 7   | 39 | Husqvarna Automower 310  | 65 | P | Yes | No  | 4 | R | Yes | No  | No  | No |
| 5 | 3 | 2023 | real                 | 237 | 7   | 39 | Husqvarna Automower 310  | 65 | P | Yes | No  | 4 | R | Yes | No  | No  | No |
| 6 | 3 | 2023 | real                 | 237 | 7   | 39 | Husqvarna Automower 310  | 65 | P | Yes | No  | 4 | R | Yes | No  | No  | No |
| 3 | 1 | 2023 | real<br>(comparison) | 419 | 9   | 57 | Husqvarna Automower 310  | 65 | P | Yes | No  | 4 | R | Yes | No  | No  | No |
| 3 | 2 | 2023 | frozen               | 192 | 8   | 37 | Husqvarna Automower 310  | 65 | P | Yes | No  | 4 | R | Yes | No  | No  | No |
| 1 | 2 | 2023 | real                 | 318 | 9   | 40 | Husqvarna Automower 305  | 52 | P | No  | Yes | 4 | R | Yes | No  | No  | No |
| 2 | 1 | 2023 | real                 | 318 | 9   | 40 | Husqvarna Automower 305  | 52 | P | No  | Yes | 4 | R | Yes | No  | No  | No |
| 3 | 2 | 2023 | real                 | 318 | 9   | 40 | Husqvarna Automower 305  | 52 | P | No  | Yes | 4 | R | Yes | No  | No  | No |
| 4 | 2 | 2023 | real                 | 318 | 9   | 40 | Husqvarna Automower 305  | 52 | P | No  | Yes | 4 | R | Yes | No  | No  | No |
| 5 | 1 | 2023 | real                 | 318 | 9   | 40 | Husqvarna Automower 305  | 52 | P | No  | Yes | 4 | R | Yes | No  | No  | No |
| 6 | 1 | 2023 | real                 | 318 | 9   | 40 | Husqvarna Automower 305  | 52 | P | No  | Yes | 4 | R | Yes | No  | No  | No |
| 1 | 2 | 2020 | real                 | 422 |     |    | Husqvarna Automower 305  |    | P | No  | Yes | 4 | R | Yes | No  | No  | No |
| 2 | 2 | 2020 | real                 | 422 |     |    | Husqvarna Automower 305  |    | P | No  | Yes | 4 | R | Yes | No  | No  | No |
| 3 | 2 | 2020 | real                 | 422 |     |    | Husqvarna Automower 305  |    | P | No  | Yes | 4 | R | Yes | No  | No  | No |
| 3 | 2 | 2023 | real<br>(comparison) | 419 | 9   | 57 | Husqvarna Automower 305  | 52 | P | No  | Yes | 4 | R | Yes | No  | No  | No |
| 5 | 4 | 2023 | real<br>(comparison) | 419 | 9   | 57 | Husqvarna Automower 305  | 52 | P | No  | Yes | 4 | R | Yes | No  | No  | No |
| 6 | 4 | 2023 | real<br>(comparison) | 419 | 9   | 57 | Husqvarna Automower 305  | 52 | P | No  | Yes | 4 | R | Yes | No  | No  | No |
| 5 | 2 | 2023 | real<br>(comparison) | 419 | 9   | 57 | Husqvarna Automower 305  | 52 | P | No  | Yes | 4 | R | Yes | No  | No  | No |
| 6 | 4 | 2023 | real<br>(comparison) | 419 | 9   | 57 | Husqvarna Automower 305  | 52 | P | No  | Yes | 4 | R | Yes | No  | No  | No |
| 3 | 2 | 2023 | frozen               | 192 | 8   | 37 | Husqvarna Automower 305  | 52 | P | No  | Yes | 4 | R | Yes | No  | No  | No |
| 1 | 3 | 2023 | real                 | 241 | 7   | 38 | Husqvarna Automower 105  | 45 | P | Yes | No  | 3 | F | Yes | No  | No  | No |
| 2 | 3 | 2023 | real                 | 241 | 7   | 38 | Husqvarna Automower 105  | 45 | P | Yes | No  | 3 | F | Yes | No  | No  | No |
| 3 | 4 | 2023 | real                 | 241 | 7   | 38 | Husqvarna Automower 105  | 45 | P | Yes | No  | 3 | F | Yes | No  | No  | No |
| 4 | 4 | 2023 | real                 | 241 | 7   | 38 | Husqvarna Automower 105  | 45 | P | Yes | No  | 3 | F | Yes | No  | No  | No |
| 5 | 4 | 2023 | real                 | 241 | 7   | 38 | Husqvarna Automower 105  | 45 | P | Yes | No  | 3 | F | Yes | No  | No  | No |
| 6 | 4 | 2023 | real                 | 241 | 7   | 38 | Husqvarna Automower 105  | 45 | P | Yes | No  | 3 | F | Yes | No  | No  | No |
| 1 | 2 | 2020 | real                 | 422 |     |    | Husqvarna Automower 105  |    | P | Yes | No  | 3 | F | Yes | No  | No  | No |

|   |   |      |                      |     |     |    |                         |    |   |     |     |   |   |     |    |    |    |
|---|---|------|----------------------|-----|-----|----|-------------------------|----|---|-----|-----|---|---|-----|----|----|----|
| 2 | 2 | 2020 | real                 | 422 |     |    | Husqvarna Automower 105 |    | P | Yes | No  | 3 | F | Yes | No | No | No |
| 3 | 1 | 2020 | real                 | 422 |     |    | Husqvarna Automower 105 |    | P | Yes | No  | 3 | F | Yes | No | No | No |
| 3 | 2 | 2023 | real<br>(comparison) | 419 | 9   | 57 | Husqvarna Automower 105 | 45 | P | Yes | No  | 3 | F | Yes | No | No | No |
| 5 | 3 | 2023 | real<br>(comparison) | 419 | 9   | 57 | Husqvarna Automower 105 | 45 | P | Yes | No  | 3 | F | Yes | No | No | No |
| 6 | 4 | 2023 | real<br>(comparison) | 419 | 9   | 57 | Husqvarna Automower 105 | 45 | P | Yes | No  | 3 | F | Yes | No | No | No |
| 3 | 2 | 2023 | frozen               | 192 | 8   | 37 | Husqvarna Automower 105 | 45 | P | Yes | No  | 3 | F | Yes | No | No | No |
| 1 | 3 | 2023 | real                 | 229 | 5.5 | 38 | Honda Miimo HRM 40 Live | 47 | P | Yes | Yes | 4 | R | No  | No | No | No |
| 2 | 3 | 2023 | real                 | 229 | 5.5 | 38 | Honda Miimo HRM 40 Live | 47 | P | Yes | Yes | 4 | R | No  | No | No | No |
| 3 | 3 | 2023 | real                 | 229 | 5.5 | 38 | Honda Miimo HRM 40 Live | 47 | P | Yes | Yes | 4 | R | No  | No | No | No |
| 4 | 4 | 2023 | real                 | 229 | 5.5 | 38 | Honda Miimo HRM 40 Live | 47 | P | Yes | Yes | 4 | R | No  | No | No | No |
| 5 | 3 | 2023 | real                 | 229 | 5.5 | 38 | Honda Miimo HRM 40 Live | 47 | P | Yes | Yes | 4 | R | No  | No | No | No |
| 6 | 3 | 2023 | real                 | 229 | 5.5 | 38 | Honda Miimo HRM 40 Live | 47 | P | Yes | Yes | 4 | R | No  | No | No | No |
| 1 | 1 | 2020 | real                 | 515 |     |    | Honda Miimo HRM 40 Live |    | P | Yes | Yes | 4 | R | No  | No | No | No |
| 2 | 3 | 2020 | real                 | 515 |     |    | Honda Miimo HRM 40 Live |    | P | Yes | Yes | 4 | R | No  | No | No | No |
| 3 | 1 | 2020 | real                 | 515 |     |    | Honda Miimo HRM 40 Live |    | P | Yes | Yes | 4 | R | No  | No | No | No |
| 3 | 3 | 2023 | real<br>(comparison) | 419 | 9   | 57 | Honda Miimo HRM 40 Live | 47 | P | Yes | Yes | 4 | R | No  | No | No | No |
| 3 | 4 | 2023 | frozen               | 192 | 8   | 37 | Honda Miimo HRM 40 Live | 47 | P | Yes | Yes | 4 | R | No  | No | No | No |
| 1 | 3 | 2023 | real                 | 247 | 7.5 | 40 | Gardena Sileno Life     | 35 | P | No  | Yes | 4 | F | No  | No | No | No |
| 2 | 1 | 2023 | real                 | 247 | 7.5 | 40 | Gardena Sileno Life     | 35 | P | No  | Yes | 4 | F | No  | No | No | No |
| 3 | 1 | 2023 | real                 | 247 | 7.5 | 40 | Gardena Sileno Life     | 35 | P | No  | Yes | 4 | F | No  | No | No | No |
| 4 | 1 | 2023 | real                 | 247 | 7.5 | 40 | Gardena Sileno Life     | 35 | P | No  | Yes | 4 | F | No  | No | No | No |
| 5 | 3 | 2023 | real                 | 247 | 7.5 | 40 | Gardena Sileno Life     | 35 | P | No  | Yes | 4 | F | No  | No | No | No |
| 6 | 3 | 2023 | real                 | 247 | 7.5 | 40 | Gardena Sileno Life     | 35 | P | No  | Yes | 4 | F | No  | No | No | No |
| 1 | 2 | 2020 | real                 | 422 |     |    | Gardena Sileno Life     |    | P | No  | Yes | 4 | F | No  | No | No | No |
| 2 | 2 | 2020 | real                 | 422 |     |    | Gardena Sileno Life     |    | P | No  | Yes | 4 | F | No  | No | No | No |
| 3 | 1 | 2020 | real                 | 422 |     |    | Gardena Sileno Life     |    | P | No  | Yes | 4 | F | No  | No | No | No |
| 3 | 1 | 2023 | real<br>(comparison) | 419 | 9   | 57 | Gardena Sileno Life     | 35 | P | No  | Yes | 4 | F | No  | No | No | No |
| 3 | 1 | 2023 | frozen               | 192 | 8   | 37 | Gardena Sileno Life     | 35 | P | No  | Yes | 4 | F | No  | No | No | No |
| 1 | 3 | 2023 | real                 | 229 | 5.5 | 38 | Gardena Sileno City     | 58 | P | No  | Yes | 3 | F | No  | No | No | No |
| 2 | 3 | 2023 | real                 | 229 | 5.5 | 38 | Gardena Sileno City     | 58 | P | No  | Yes | 3 | F | No  | No | No | No |
| 3 | 3 | 2023 | real                 | 229 | 5.5 | 38 | Gardena Sileno City     | 58 | P | No  | Yes | 3 | F | No  | No | No | No |
| 4 | 4 | 2023 | real                 | 229 | 5.5 | 38 | Gardena Sileno City     | 58 | P | No  | Yes | 3 | F | No  | No | No | No |
| 5 | 4 | 2023 | real                 | 229 | 5.5 | 38 | Gardena Sileno City     | 58 | P | No  | Yes | 3 | F | No  | No | No | No |
| 6 | 3 | 2023 | real                 | 229 | 5.5 | 38 | Gardena Sileno City     | 58 | P | No  | Yes | 3 | F | No  | No | No | No |
| 1 | 3 | 2020 | real                 | 422 |     |    | Gardena Sileno City     |    | P | No  | Yes | 3 | F | No  | No | No | No |
| 2 | 3 | 2020 | real                 | 422 |     |    | Gardena Sileno City     |    | P | No  | Yes | 3 | F | No  | No | No | No |
| 3 | 3 | 2020 | real                 | 422 |     |    | Gardena Sileno City     |    | P | No  | Yes | 3 | F | No  | No | No | No |
| 3 | 2 | 2023 | real<br>(comparison) | 419 | 9   | 57 | Gardena Sileno City     | 58 | P | No  | Yes | 3 | F | No  | No | No | No |
| 3 | 2 | 2023 | frozen               | 192 | 8   | 37 | Gardena Sileno City     | 58 | P | No  | Yes | 3 | F | No  | No | No | No |
| 1 | 4 | 2023 | real                 | 375 | 9   | 46 | AL-KO Robolinho 1150 W  | 50 | F | No  | Yes | 4 | R | No  | No | No | No |
| 2 | 3 | 2023 | real                 | 375 | 9   | 46 | AL-KO Robolinho 1150 W  | 50 | F | No  | Yes | 4 | R | No  | No | No | No |
| 3 | 3 | 2023 | real                 | 375 | 9   | 46 | AL-KO Robolinho 1150 W  | 50 | F | No  | Yes | 4 | R | No  | No | No | No |
| 4 | 3 | 2023 | real                 | 375 | 9   | 46 | AL-KO Robolinho 1150 W  | 50 | F | No  | Yes | 4 | R | No  | No | No | No |
| 5 | 4 | 2023 | real                 | 375 | 9   | 46 | AL-KO Robolinho 1150 W  | 50 | F | No  | Yes | 4 | R | No  | No | No | No |
| 6 | 3 | 2023 | real                 | 375 | 9   | 46 | AL-KO Robolinho 1150 W  | 50 | F | No  | Yes | 4 | R | No  | No | No | No |
| 1 | 4 | 2020 | real                 | 377 |     |    | AL-KO Robolinho 1150 W  |    | F | No  | Yes | 4 | R | No  | No | No | No |
| 2 | 3 | 2020 | real                 | 377 |     |    | AL-KO Robolinho 1150 W  |    | F | No  | Yes | 4 | R | No  | No | No | No |
| 3 | 4 | 2020 | real                 | 377 |     |    | AL-KO Robolinho 1150 W  |    | F | No  | Yes | 4 | R | No  | No | No | No |
